# Supplementary material for: Senolytic therapy to modulate the progression of Alzheimer’s Disease (SToMP-AD) – Outcomes from the first clinical trial of senolytic therapy for Alzheimer’s disease
Source: PubMed Central journal article supplement (PMC10168460; doi:10.21203/rs.3.rs-2809973/v1), 2023-04-24
Supplement: NIHPPRS2809973V1-supplement-1.pdf [file NIHPPRS2809973V1-supplement-1.pdf]

634 Supplementary Table 1: Baseline and Post-Treatment Safety Labs

| <b>Blood Marker</b>            | <b>Baseline<br/>Mean (SD)</b> | <b>Post-<br/>Treatment<br/>Mean (SD)</b> | <b>T-test(df), p-value</b> |
|--------------------------------|-------------------------------|------------------------------------------|----------------------------|
| White blood cells<br>(K/uL)    | 7.0 (2.3)                     | 5.8 (1.8)                                | t(4)=-1.197, p=0.30        |
| Red blood cells<br>(MIL/uL)    | 4.5 (0.7)                     | 4.5 (0.8)                                | t(4)=-0.726, p=0.51        |
| Hemoglobin (g/dl)              | 14.0 (1.7)                    | 14.0 (1.8)                               | t(4)=-0.215, p=0.84        |
| Hematocrit (%)                 | 41.8 (5.)                     | 41.1 (6.6)                               | t(4)=-0.497, p=0.65        |
| MCV (fL)                       | 92.2 (2.7)                    | 92.6 (2.7)                               | t(4)=0.667, p=0.54         |
| MCH (pg)                       | 31.0 (1.3)                    | 31.6 (1.8)                               | t(4)=1.199, p=0.30         |
| MCHC (g/dl)                    | 33.6 (1.8)                    | 34.2 (1.4)                               | t(4)=0.756, p=0.49         |
| RDW (%)                        | 12.6 (0.6)                    | 12.6 (0.5)                               | t(4)=-0.279, p=0.79        |
| Platelets (K/uL)               | 224.0 (69.5)                  | 235.8 (77.8)                             | t(4)=0.717, p=0.51         |
| Absolute Neutrophils<br>(K/uL) | 69.0 (6.6)                    | 64.4 (2.2)                               | t(4)=-1.696, p=0.17        |
| Absolute Lymphocyte<br>(K/uL)  | 19.0 (6.2)                    | 22.2 (4.8)                               | t(4)=1.536, p=0.20         |
| Absolute Monocyte<br>(K/uL)    | 8.8 (1.9)                     | 9.8 (2.8)                                | t(4)=1.826, p=0.14         |

|                                         |              |              |                      |
|-----------------------------------------|--------------|--------------|----------------------|
| Absolute Eosinophil<br>(K/uL)           | 2.2 (0.8)    | 2.2 (0.5)    | t(4)<0.001, p=1.0    |
| Absolute Basophil<br>(K/uL)             | 0.8 (0.5)    | 1.0 (0)      | t(4)=1.000, p=0.37   |
| Glucose (mg/dL)                         | 91.4 (14.6)  | 87.6 (24.2)  | t(4)=-0.656, p=0.55  |
| Blood Urea Nitrogen<br>(mg/dL)          | 17.6 (6.5)   | 16.0 (1.7)   | t(4)=-0.726, p=0.51  |
| Creatinine (mg/dL)                      | 0.90 (0.15)  | 0.86 (0.15)  | t(4)=-0.539, p=0.62  |
| eGFR (mL/min/1.73)                      | 73.2 (10.6)  | 79.6 (9.6)   | t(4)=1.082, p=0.34   |
| Sodium (mmol/L)                         | 140.4 (1.5)  | 141.0 (2.1)  | t(4)=0.440, p=0.68   |
| Potassium (mmol/L)                      | 4.3 (0.3)    | 4.2 (0.3)    | t(4)=-0.250, p=0.81  |
| Calcium (mg/dL)                         | 9.5 (0.5)    | 9.4 (0.5)    | t(4)=-1.725, p=0.16  |
| Total Protein (g/dL)                    | 6.7 (0.5)    | 6.6 (0.4)    | t(4)=-2.359, p=0.078 |
| Albumin (g/dL)                          | 4.3 (0.2)    | 4.2 (0.2)    | t(4)=-1.000, p=0.37  |
| Bilirubin (mg/dL)                       | 0.6 (0.3)    | 0.4 (0.1)    | t(4)=-2.236, p=0.089 |
| Alkaline Phosphate<br>(IU/L)            | 73.2 (23.7)  | 75.2 (23.7)  | t(4)=0.381, p=0.72   |
| Aspartate<br>Aminotransferase<br>(IU/L) | 21.2 (6.2)   | 21.6 (4.2)   | t(4)=0.209, p=0.84   |
| Alanine Transaminase<br>(IU/L)          | 15.6 (3.6)   | 17.0 (5.2)   | t(4)=0.560, p=0.61   |
| Total Cholesterol<br>(mg/dL)            | 169.2 (35.5) | 179.4 (40.0) | t(4)=2.904, p=0.044* |
| Triglycerides, (mg/dL)                  | 79.6 (9.4)   | 102.0 (13.5) | t(4)=2.535, p=0.064  |

|                            |             |             |                     |
|----------------------------|-------------|-------------|---------------------|
| HDL-Cholesterol<br>(mg/dL) | 68.6 (20.0) | 67.6 (21.7) | t(4)=-0.632, p=0.56 |
| LDL-Cholesterol<br>(mg/dL) | 85.5 (17.9) | 93.8 (21.9) | t(4)=2.493, p=0.067 |
| Hemoglobin A1c (%)         | 5.4 (0.4)   | 5.3 (0.2)   | t(4)=-0.739, p=0.50 |

635 \*p<0.05
